# Supplementary material for: RNA-Sequencing Reveals the Involvement of Sesquiterpene Biosynthesis Genes and Transcription Factors during an Early Response to Mechanical Wounding of Aquilaria sinensis
Source: MDPI journal article supplement (doi:10.3390/genes14020464), 2023-02-11
Supplement: s1 [file s1]

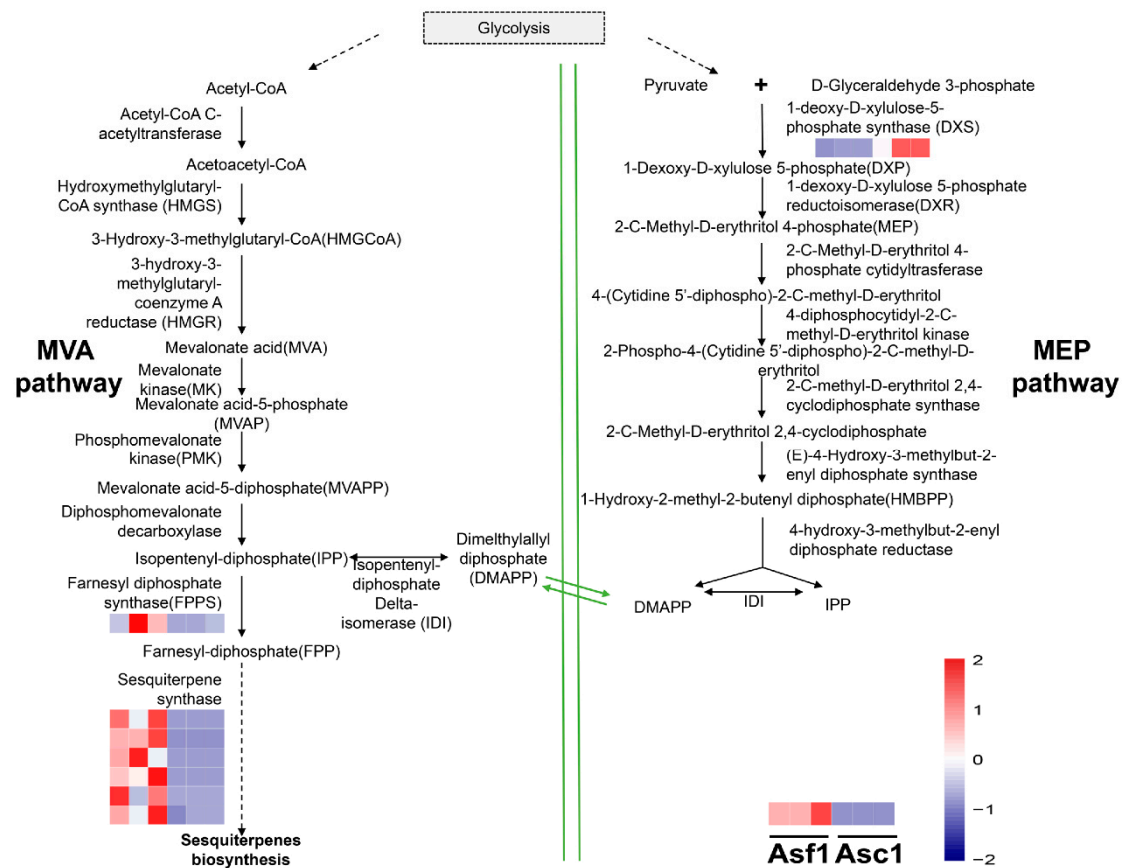

**Figure S1.** Schematic diagram of sesquiterpenoid biosynthesis pathway activated in *A. sinensis* responding to mechanical wounding. Each row represents each DEG, and each column represents the expression level from different samples. The color from blue to red represents gene expression from low to high.

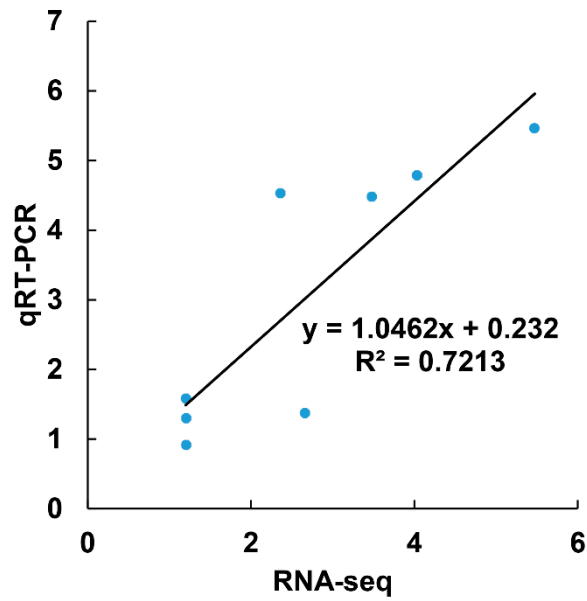

**Figure S2.** The comparison of the expression levels of eight genes between RNA-seq and qRT-PCR. The x-axis and y-axis represent the  $\log_2(\text{fold change})$  values by RNA-seq and qRT-PCR for each gene, respectively.

**Table S1.** Primer pairs of selected genes for qRT-PCR validation.

| Gene ID   | Primer pairs                                        |
|-----------|-----------------------------------------------------|
| Ubiquitin | F:CCAGATCAATCTTGATTCCACC<br>R:ACCTAAACCAGAGCCCCCTA  |
| MYB2      | F:GCAACCACCAATAGCCCTGT<br>R:TCACCACTCCAATTCCAAACA   |
| bHLH25    | F:TCCTTGTGATTCTTCATTTCG<br>R:TGAGCCTCTCTCGTCTCTTCCT |
| SSL6      | F:ATCCCAAGACCAAGAGCACC<br>R:GAATATTATCCGGCAAGCCAG   |
| SYPI21    | F:AGCGAGATTCAGGAGAGGCA<br>R:CGACCAAGATGATGATGAGGAG  |
| PHT1-4    | F:AGAGGCGGAGGAAGAGAAAGT<br>R:TGAGGAGAGCGATGAGGGTT   |
| CYP749A20 | F:TTATATCCCCCTGTTTTGTCTG<br>R:TGTTCTTCGTTGCTTTCGCT  |
| C4        | F:GAGTCCAATACGAGCCCCAA<br>R:CGTCGCTTCAATTTCCACC     |
| LHT1      | F:TACATTCCCTTTCTTCGGTGG<br>R:GCTTGGATGATGATTTCCTC   |

**Table S2.** DEGs involved in hormone signal transduction.

| Gene ID                  | Gene description | Fold change |
|--------------------------|------------------|-------------|
| evm.model.Scaffold43.250 | AUX/IAA          | 0.33        |
| evm.model.Scaffold4.216  | AUX/IAA          | 0.07        |
| evm.model.Scaffold12.178 | SAUR             | 0.08        |
| evm.model.Scaffold13.104 | SAUR             | 563.62      |
| evm.model.Scaffold2.51   | SAUR             | 0.06        |
| evm.model.Scaffold74.8   | SAUR             | 0.07        |
| evm.model.Scaffold3.405  | SAUR             | 0.01        |
| evm.model.Scaffold8.391  | SAUR             | 128.06      |
| evm.model.Scaffold11.46  | SAUR             | 0.05        |
| evm.model.Scaffold16.5   | COI1             | 0.38        |
| evm.model.Scaffold206.78 | MYC2             | 44.77       |
| evm.model.Scaffold251.7  | A-ARR            | 8.22        |
| evm.model.Scaffold3.493  | A-ARR            | 12.13       |
| evm.model.Scaffold548.8  | PYR/RYL          | 0.31        |
| evm.model.Scaffold50.26  | EIN3             | 0.48        |
| evm.model.Scaffold6.539  | BAK1             | 4.24        |
| evm.model.Scaffold2.236  | BKI1             | 19.76       |
| evm.model.Scaffold64.58  | TGA              | 45.75       |
| evm.model.Scaffold192.66 | TGA              | 557.39      |
| evm.model.Scaffold31.203 | TGA              | 0.21        |

**Table S3.** DEGs involved in 2-(2-phenylethyl)chromone biosynthesis.

| Gene ID                  | Gene description | Fold change |
|--------------------------|------------------|-------------|
| evm.model.Scaffold17.138 | CHS              | 69.57       |
| evm.model.Scaffold61.7   | CHS1             | 21.66       |
| evm.model.Scaffold290.11 | COMT             | 1472.86     |

**Table S4.** DEGs involved in sesquiterpene biosynthesis.

| Gene ID                   | Gene description                             | Fold change |
|---------------------------|----------------------------------------------|-------------|
| evm.model.Scaffold281.31  | DXS, 1-deoxy-D-xylulose-5-phosphate synthase | 0.09        |
| evm.model.Scaffold111.82  | FPPS, farnesyl diphosphate synthase          | 31.03       |
| evm.model.Scaffold141.124 | SS1, sequiterpene synthase1                  | 27819.51    |
| evm.model.Scaffold36.127  | SS2, sequiterpene synthase2                  | 1242.42     |
| novel.1797                | SS3, sequiterpene synthase3                  | 538.21      |
| novel.2101                | SS4, sequiterpene synthase4                  | 127.89      |
| evm.model.Scaffold49.131  | SS5, sequiterpene synthase5                  | 194.56      |
| novel.2100                | SS6, sequiterpene synthase6                  | 11.77       |

**Table S5.** DEGs related to transcription factors.

| Gene ID                  | Gene description                                             | TF family | Fold change |
|--------------------------|--------------------------------------------------------------|-----------|-------------|
| evm.model.Scaffold10.36  | Probable WRKY72                                              | WRKY      | 208.77      |
| evm.model.Scaffold113.34 | Probable WRKY54                                              | WRKY      | 0.06        |
| evm.model.Scaffold131.93 | Probable WRKY48                                              | WRKY      | 16.63       |
| evm.model.Scaffold135.59 | Probable WRKY48                                              | WRKY      | 40.02       |
| evm.model.Scaffold171.22 | Probable WRKY28                                              | WRKY      | 196.91      |
| evm.model.Scaffold19.164 | WRKY6                                                        | WRKY      | 106.24      |
| evm.model.Scaffold271.5  | Probable WRKY72                                              | WRKY      | 1120.23     |
| evm.model.Scaffold3.221  | Probable WRKY29                                              | WRKY      | 297.41      |
| evm.model.Scaffold49.21  | WRKY6                                                        | WRKY      | 158.01      |
| evm.model.Scaffold7.243  | Probable WRKY47                                              | WRKY      | 16.95       |
| evm.model.Scaffold7.283  | Probable WRKY23                                              | WRKY      | 3.64        |
| evm.model.Scaffold7.87   | WRKY22                                                       | WRKY      | 0.17        |
| evm.model.Scaffold8.405  | Probable WRKY71                                              | WRKY      | 989.44      |
| evm.model.Scaffold9.167  | Probable WRKY75                                              | WRKY      | 43.26       |
| evm.model.Scaffold112.45 | AP2-like ethylene-responsive AIL6                            | AP2       | 9.54        |
| evm.model.Scaffold13.71  | Ethylene-responsive ERF115                                   | AP2       | 221.10      |
| evm.model.Scaffold131.31 | Ethylene-responsive RAP2-3                                   | AP2       | 0.26        |
| evm.model.Scaffold307.28 | Ethylene-responsive ERF114                                   | AP2       | 167.45      |
| evm.model.Scaffold38.135 | Pathogenesis-related genes<br>transcriptional activator PTI5 | AP2       | 240.75      |
| evm.model.Scaffold53.50  | Ethylene-responsive2                                         | AP2       | 86.51       |
| evm.model.Scaffold74.54  | Ethylene-responsive ERF115                                   | AP2       | 13551.73    |
| evm.model.Scaffold192.66 | TGAL7                                                        | bZIP      | 557.39      |
| evm.model.Scaffold2.100  | bZIP44                                                       | bZIP      | 4.47        |
| evm.model.Scaffold6.343  | ABSCISIC ACID-INSENSITIVE<br>5-like protein 7                | bZIP      | 0.44        |
| evm.model.Scaffold64.58  | TGAL11                                                       | bZIP      | 45.75       |
| evm.model.Scaffold7.303  | bZIP53                                                       | bZIP      | 2.36        |
| evm.model.Scaffold1.376  | bHLH25                                                       | bHLH      | 15.66       |
| evm.model.Scaffold2.401  | bHLH93                                                       | bHLH      | 0.14        |
| evm.model.Scaffold206.78 | MYC2                                                         | bHLH      | 44.77       |
| evm.model.Scaffold22.131 | p-helix DNA-binding domain                                   | bHLH      | 202.84      |
| evm.model.Scaffold28.184 | bHLH25                                                       | bHLH      | 27.85       |
| evm.model.Scaffold29.150 | Putative bHLH041                                             | bHLH      | 57.45       |
| evm.model.Scaffold46.105 | bHLH82                                                       | bHLH      | 0.26        |
| evm.model.Scaffold5.546  | Putative bHLH041                                             | bHLH      | 169.70      |
| evm.model.Scaffold6.47   | bHLH25                                                       | bHLH      | 44.40       |
| evm.model.Scaffold60.31  | bHLH30                                                       | bHLH      | 18.70       |
| evm.model.Scaffold8.93   | PIF1                                                         | bHLH      | 0.40        |
| evm.model.Scaffold95.41  | bHLH36                                                       | bHLH      | 123.19      |

**Table S6.** Expression profiles of TFs were correlated with genes involved in sesquiterpene biosynthesis.

| Gene ID                  | Gene description                  | TF family | Pearson correlation coefficient (cor) |      |             |             |            |             |             |             |
|--------------------------|-----------------------------------|-----------|---------------------------------------|------|-------------|-------------|------------|-------------|-------------|-------------|
|                          |                                   |           | DXS                                   | FPPS | SS1         | SS2         | SS3        | SS4         | SS5         | SS6         |
| evm.model.Scaffold10.36  | Probable WRKY72                   | WRKY      | -                                     | -    | -           | 0.963690981 | -          | -           | -           | -           |
| evm.model.Scaffold113.34 | Probable WRKY54                   | WRKY      | 0.907162824                           | -    | -           | -           | -          | -           | -           | -           |
| evm.model.Scaffold131.93 | Probable WRKY48                   | WRKY      | -                                     | -    | 0.972177523 | 0.96489446  | -          | 0.990938546 | -           | 0.99541661  |
| evm.model.Scaffold135.59 | Probable WRKY48                   | WRKY      | -                                     | -    | 0.919425369 | -           | -          | -           | 0.985888134 | -           |
| evm.model.Scaffold171.22 | Probable WRKY28                   | WRKY      | -                                     | -    | 0.939651576 | -           | -          | 0.980523982 | -           | 0.986222882 |
| evm.model.Scaffold19.164 | WRKY6                             | WRKY      | -                                     | -    | 0.913988827 | 0.946653757 | -          | -           | -           | -           |
| evm.model.Scaffold271.5  | Probable WRKY72                   | WRKY      | -                                     | -    | -           | -           | 0.95225151 | -           | -           | -           |
| evm.model.Scaffold3.221  | Probable WRKY29                   | WRKY      | -                                     | -    | 0.901746174 | -           | -          | 0.967652899 | -           | 0.966884949 |
| evm.model.Scaffold49.21  | WRKY6                             | WRKY      | -                                     | -    | 0.964555044 | 0.907959875 | -          | 0.977026404 | -           | 0.992896913 |
| evm.model.Scaffold7.243  | Probable WRKY47                   | WRKY      | -                                     | -    | -           | -           | -          | 0.953304528 | -           | 0.90968441  |
| evm.model.Scaffold7.283  | Probable WRKY23                   | WRKY      | -                                     | -    | -           | 0.922849089 | -          | 0.96982079  | -           | 0.935549574 |
| evm.model.Scaffold7.87   | WRKY22                            | WRKY      | -                                     | -    | -           | -0.91396498 | -          | -           | -           | -           |
| evm.model.Scaffold8.405  | Probable WRKY71                   | WRKY      | -                                     | -    | 0.96553656  | -           | -          | 0.954592648 | -           | 0.983509094 |
| evm.model.Scaffold9.167  | Probable WRKY75                   | WRKY      | -                                     | -    | 0.982333853 | 0.917061171 | -          | -           | 0.939147262 | 0.924077332 |
| evm.model.Scaffold112.45 | AP2-like ethylene-responsive AIL6 | AP2       | -                                     | -    | -           | 0.912427968 | -          | -           | -           | -           |
| evm.model.Scaffold13.71  | Ethylene-responsive ERF115        | AP2       | -                                     | -    | 0.91415969  | -           | -          | 0.973636944 | -           | 0.974112578 |
| evm.model.Scaffold131.31 | Ethylene-responsive RAP2-3        | AP2       | 0.988060865                           | -    | -           | -           | -          | -           | -           | -           |
| evm.model.Scaffold307.28 | Ethylene-responsive ERF114        | AP2       | -                                     | -    | 0.904946609 | 0.951301863 | -          | 0.996189451 | -           | 0.968301068 |



|                          |                                                           |      |             |             |             |             |             |             |             |             |
|--------------------------|-----------------------------------------------------------|------|-------------|-------------|-------------|-------------|-------------|-------------|-------------|-------------|
| evm.model.Scaffold38.135 | Pathogenesis-related genes transcriptional activator PTI5 | AP2  | -           | -           | 0.934418781 | -           | -           | 0.957840544 | -           | 0.975572503 |
| evm.model.Scaffold53.50  | Ethylene-responsive2                                      | AP2  | -           | -           | 0.959079187 | 0.929550036 | -           | 0.989814037 | -           | 0.994833018 |
| evm.model.Scaffold74.54  | Ethylene-responsive ERF115                                | AP2  | -           | -           | -           | -           | -           | 0.948120286 | -           | 0.943052971 |
| evm.model.Scaffold192.66 | TGAL7                                                     | bZIP | -           | -           | 0.913527945 | 0.999158294 | -           | 0.955937791 | -           | 0.928621714 |
| evm.model.Scaffold2.100  | bZIP44                                                    | bZIP | -           | -           | 0.992545052 | 0.91620193  | -           | 0.933670535 | 0.931199821 | 0.978479476 |
| evm.model.Scaffold6.343  | ABSCISIC ACID-INSENSITIVE 5-like protein 7                | bZIP | -           | -           | -           | -0.92299566 | -           | -           | -           | -           |
| evm.model.Scaffold64.58  | TGAL11                                                    | bZIP | -           | -           | -           | 0.9675408   | -           | -           | -           | -           |
| evm.model.Scaffold7.303  | bZIP53                                                    | bZIP | -           | -           | 0.975013119 | 0.981307067 | -           | 0.973996225 | -           | 0.98105101  |
| evm.model.Scaffold1.376  | bHLH25                                                    | bHLH | -           | -           | -           | -           | -           | 0.907613919 | -           | -           |
| evm.model.Scaffold2.401  | bHLH93                                                    | bHLH | 0.950768076 | -           | -           | -           | -           | -           | -           | -           |
| evm.model.Scaffold206.78 | MYC2                                                      | bHLH | -           | 0.921214566 | -           | -           | 0.917845566 | -           | -           | -           |
| evm.model.Scaffold22.131 | p-helix DNA-binding domain                                | bHLH | -           | -           | -           | -           | -           | 0.903808426 | -           | -           |
| evm.model.Scaffold28.184 | bHLH25                                                    | bHLH | -           | -           | -           | -           | -           | -           | 0.951351038 | -           |
| evm.model.Scaffold29.150 | Putative bHLH041                                          | bHLH | -           | -           | 0.985054475 | -           | -           | 0.942545604 | 0.927974945 | 0.98158514  |
| evm.model.Scaffold46.105 | bHLH82                                                    | bHLH | -           | -           | -           | -0.94977593 | -           | -           | -           | -           |
| evm.model.Scaffold5.546  | Putative bHLH041                                          | bHLH | -           | -           | -           | 0.98747536  | -           | 0.97209321  | -           | 0.931595667 |
| evm.model.Scaffold6.47   | bHLH25                                                    | bHLH | -           | -           | 0.977789135 | 0.928205057 | -           | -           | 0.923795183 | 0.918901095 |
| evm.model.Scaffold60.31  | bHLH30                                                    | bHLH | -           | -           | 0.961825798 | -           | -           | -           | 0.993148317 | -           |
| evm.model.Scaffold8.93   | PIF1                                                      | bHLH | -           | -           | -           | -0.93270524 | -           | -           | -           | -           |
| evm.model.Scaffold95.41  | bHLH36                                                    | bHLH | -           | 0.941851497 | -           | -           | -           | -           | -           | -           |

**Table S7.** qRT-PCR validation of selected genes obtained by RNA-seq in *A. sinensis* subjected to mechanical wounding.

| Gene ID   | log <sub>2</sub> (fold change) |         |
|-----------|--------------------------------|---------|
|           | RNA-seq                        | qRT-PCR |
| MYB2      | 2.66                           | 1.38    |
| bHLH25    | 5.47                           | 5.46    |
| SSL6      | 2.36                           | 4.53    |
| SYP121    | 1.20                           | 1.58    |
| PHT1-4    | 3.48                           | 4.49    |
| CYP749A20 | 1.20                           | 0.92    |
| C4        | 1.20                           | 1.30    |
| LHT1      | 4.03                           | 4.79    |
